# Supplementary material
Source: PubMed Central journal article supplement (PMC7492356)
Supplement: 10815_2020_1886_MOESM4_ESM.pdf [file 10815_2020_1886_MOESM4_ESM.pdf]

**Culture of human ovarian tissue in xeno-free conditions using laminin components of the human ovarian extracellular matrix**

*ONLINE RESOURCES*

**Table 1.** Overview of participant characteristics.

**Table 2.** Antibodies

**Table 3.** Primers

**Table 4.** Statistical values for laminin expression in single cell data

**Table 5.** Summary of laminin expression analyses

**Table 1.** Overview of participant characteristics.

| <b>Study</b>                                  | <b>Type of sample and donor</b>                                                 | <b>Number of donors</b> | <b>Donor age Mean, SD</b> |
|-----------------------------------------------|---------------------------------------------------------------------------------|-------------------------|---------------------------|
| Laminin expression in ovarian cortex          | Ovarian cortical biopsies<br>C-section patients                                 | 6                       | 33.50 ±4.13               |
| Laminin expression in mural granulosa cells   | Follicular fluid<br><i>In vitro</i> fertilization patients                      | 10                      | Anonymous                 |
| Laminin expression in cumulus granulosa cells | Cumulus cells from denuded oocytes<br>Intracytoplasmic sperm injection patients | 10                      | Anonymous                 |
| 7-day culture                                 | Ovarian cortical biopsies<br>C-section patients                                 | 17                      | 33.59±5.39                |

**Table 2.** Antibodies

| <b>Target</b> | <b>Host species</b> | <b>Company</b>   | <b>Catalogue number</b> | <b>Dilution</b> |
|---------------|---------------------|------------------|-------------------------|-----------------|
| LAMA1         | Rabbit              | Atlas Antibodies | HPA032110               | 1:200           |
| LAMA2         | Rabbit              | Assay Biotech    | C13065                  | 1:200           |
| LAMA3         | Rabbit              | Atlas Antibodies | HPA009309               | 1:200           |
| LAMA5         | Mouse               | Abnova           | MAB7872                 | 1:50            |
| LAMB1         | Rabbit              | Atlas Antibodies | HPA004132               | 1:200           |
| LAMB2         | Rabbit              | Atlas Antibodies | HPA001895               | 1:200           |
| LAMC1         | Rabbit              | Atlas Antibodies | HPA001908               | 1:200           |
| FSHR          | Goat                | Santa Cruz       | sc-7798                 | 1:100           |
| Inhibin-a     | Rabbit              | Abcam            | ab81234                 | 1:200           |
| Ki67          | Rabbit              | Abcam            | Ab92742                 | 1:500           |
| Rabbit IgG    | Chicken             | Santa Cruz       | sc-2963                 | 1:200           |
| Mouse IgG     | Chicken             | Santa Cruz       | sc-2954                 | 1:200           |

**Table 3.** Primers

| Gene         | Target transcript(s)                                                                | Forward primer (5'-3')        | Reverse primer (5'-3')  |
|--------------|-------------------------------------------------------------------------------------|-------------------------------|-------------------------|
| <i>LAMA1</i> | NM_005559.3                                                                         | CAGCCCTCCTGCCAGTTTTA          | AACTGCCACCTGGTGTTTGA    |
| <i>LAMA2</i> | NM_000426.3<br>NM_001079823.1                                                       | TTTGCCAAAGCAGTTGGTGG          | CCCCAGAAGAACTCCAGTCG    |
| <i>LAMA3</i> | NM_000227.3<br>NM_001127717.1<br>NM_001127718.1<br>NM_198129.1                      | GGTCATGTCGTCTTGGCTCA          | CTTGGGCGGATGCTGAAAAC    |
| <i>LAMA4</i> | NM_001105206.2<br>NM_001105207.2<br>NM_001105208.2<br>NM_001105209.2<br>NM_002290.4 | GAGGGAAGACCGCAGGAAA           | CCTGGCTTCCTTCTCACATTCA  |
| <i>LAMA5</i> | NM_005560.4                                                                         | GGAGAACGGAGAGATCGTGG          | CAGCGGCGAGTAGGAGAAAT    |
| <i>LAMB1</i> | NM_002291.2                                                                         | CAAAGCAACAGCACAGCCAA          | CTATCCAAGGCACCCCGAAT    |
| <i>LAMB2</i> | NM_002292.3                                                                         | AGACCGTTCACCTCCCCTTA          | GCCAGCACGCTTAGCAGTAG    |
| <i>LAMB3</i> | <u>NM_000228.2</u><br><u>NM_001017402.1</u><br><u>NM_001127641.1</u>                | CCCATGAATGCCAAAGGTGC          | CTGACACCGCTCACAGTTCT    |
| <i>LAMB4</i> | NM_007356.2                                                                         | GCTAGCGAATGTCGCCCTAT          | TGACCGTGAACCATTCCAGG    |
| <i>LAMC1</i> | NM_007356.2                                                                         | GTCCTGTGGGCTCTCTAAGC          | AGGGATCACAAGAGCATGGC    |
| <i>LAMC2</i> | <u>NM_005562.2</u><br><u>NM_018891.2</u>                                            | TCCAGGAGGGAAGTCTGTGA          | GTCATTGCAGTTGAGGCAGC    |
| <i>LAMC3</i> | NM_006059.3                                                                         | GCGACGCTACGGCAAACAG           | TGCAGCTTCATTCTCCAGAT    |
| <i>RPLP0</i> | NM_001002.3                                                                         | ACAGGGCGACCTGGAAGTCC<br>AACTA | AGCCACATTGTCTGCTCCACA   |
| <i>HPRT1</i> | NM_000194.2                                                                         | GCCCTGGCGTCGTGATTAG           | CGAGCAAGACGTTTCAGTCCTGT |

**Table 4.** Statistical values for laminin expression in single-cell data

P-values for differences in laminin gene expression levels within each cell type in the single-cell dataset. Associates to Figure 3. All significant differences are shown.

| Cell type    | Comparison  | P adjusted |
|--------------|-------------|------------|
| Endothelial  | LAMB2-LAMA2 | 4,9E-07    |
| Endothelial  | LAMB2-LAMA3 | 0,00269    |
| Endothelial  | LAMB2-LAMA4 | 0,00046    |
| Endothelial  | LAMC3-LAMA4 | 0,00815    |
| Endothelial  | LAMB2-LAMA5 | 0,00072    |
| Endothelial  | LAMC3-LAMA5 | 0,00167    |
| Endothelial  | LAMB2-LAMB1 | 6,1E-08    |
| Endothelial  | LAMC1-LAMB2 | 6,1E-06    |
| Endothelial  | LAMC3-LAMB2 | 1,5E-07    |
| Endothelial  | LAMC3-LAMC1 | 0,01653    |
| Perivascular | LAMB2-LAMA3 | 0,01129    |
| Perivascular | LAMB2-LAMA5 | 0,00079    |
| Stromal      | LAMB2-LAMA1 | 1,1E-06    |
| Stromal      | LAMA3-LAMA2 | 0,0221     |
| Stromal      | LAMA5-LAMA2 | 0,00061    |
| Stromal      | LAMB2-LAMA2 | 3,9E-11    |
| Stromal      | LAMB2-LAMA3 | 3,6E-07    |
| Stromal      | LAMB2-LAMA4 | 1,3E-11    |
| Stromal      | LAMB2-LAMA5 | 1,4E-11    |
| Stromal      | LAMB2-LAMB1 | 6,2E-10    |
| Stromal      | LAMC1-LAMB2 | 1,3E-11    |

**Table 5.** Summary of laminin expression analyses

|                |                                | A1 | A2 | A3 | A4 | A5 | B1 | B2 | B3 | B4 | C1 | C2 | C3 |
|----------------|--------------------------------|----|----|----|----|----|----|----|----|----|----|----|----|
| <b>RNA</b>     | Bulk cortex                    | -  | ++ | +  | -  | +  | +  | ++ | -  | -  | ++ | -  | -  |
|                | Bulk whole ovary               | -  | ++ | +  | -  | -  | +  | ++ | -  | -  | ++ | -  | -  |
|                | Bulk mural GC                  | +  | -  | +  | -  | -  | +  | ++ | -  | -  | ++ | -  | -  |
|                | Bulk cumulus GC                | -  | -  | ++ | -  | -  | -  | ++ | -  | -  | ++ | -  | -  |
|                | Single stromal cells           | +  | ++ | +  | ++ | +  | +  | ++ | -  | -  | ++ | -  | -  |
|                | Single endothelial cells       | +  | +  | +  | +  | ++ | +  | ++ | -  | -  | ++ | -  | +  |
|                | Single perivascular cells      | -  | +  | +  | +  | ++ | +  | ++ | -  | -  | ++ | -  | +  |
| <b>PROTEIN</b> | Stroma and preantral follicles | -  | ++ | +  | NA | -  | +  | ++ | NA | NA | +  | NA | NA |
|                | Small antral follicles         | ++ | ++ | +  | NA | -  | ++ | +  | NA | NA | ++ | NA | NA |
|                | Mural GC                       | ++ | ++ | ++ | NA | -  | +  | ++ | NA | NA | ++ | NA | NA |
|                | Cumulus GC                     | ++ | ++ | ++ | NA | -  | +  | ++ | NA | NA | ++ | NA | NA |

++ robustly expressed

+ expression detected but either at low level or only in some cells

- no clear expression detected

GC granulosa cells

NA not analyzed
